# Supplementary material for: Application of Aspergillus niger in Practical Biotechnology of Industrial Recovery of Potato Starch By-Products and Its Flocculation Characteristics
Source: MDPI journal article supplement (doi:10.3390/microorganisms10091847), 2022-09-15
Supplement: s1 [file s1]

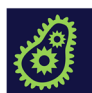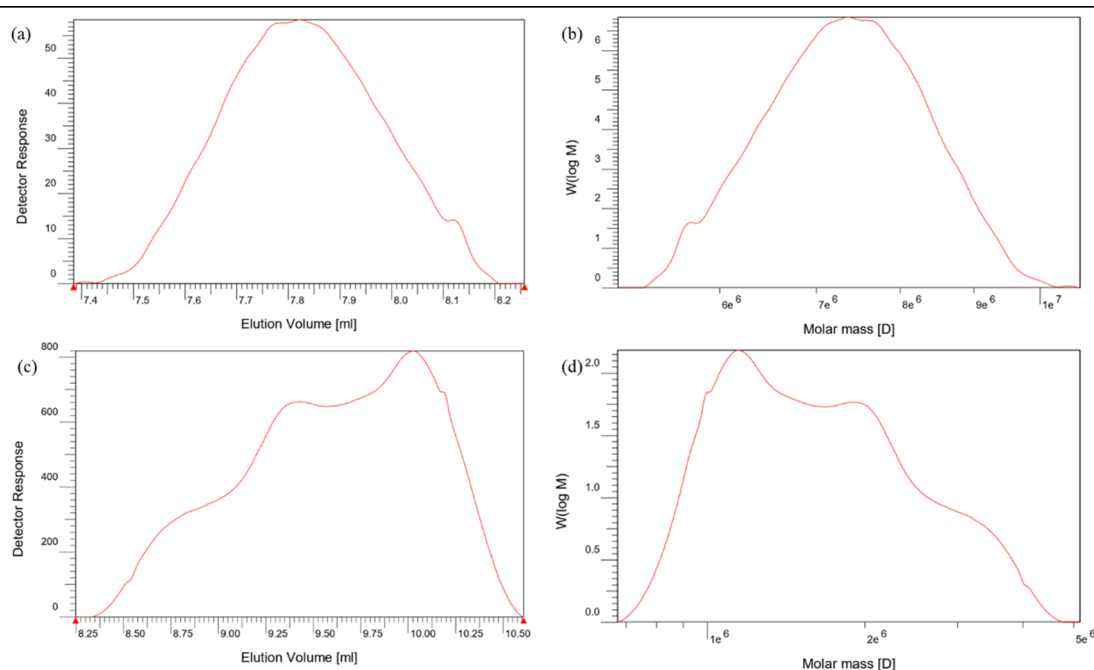

**Figure S1.** The two molecular weight distributions. (a) and (c) represent the relationship between the elution volume and the detector response of M-1 and M-2, respectively; (b) and (d) represent the relationship between molar mass and  $W(\log M)$  of M-1 and M-2, respectively.

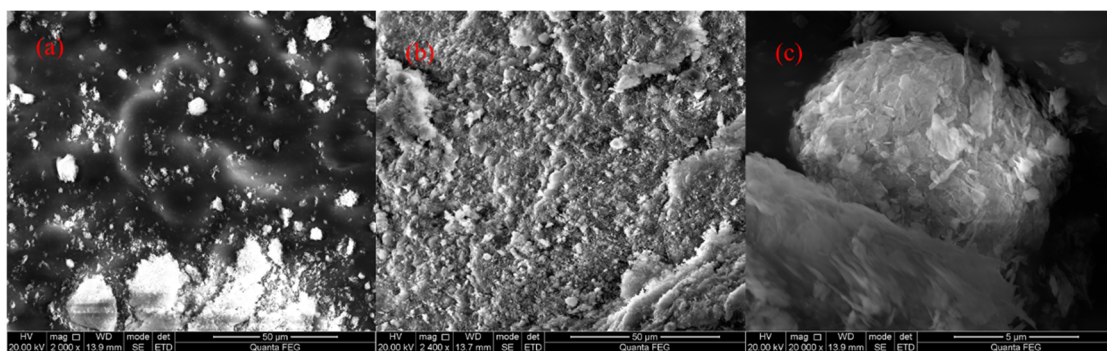

**Figure S2.** SEM observation of kaolin, kaolin after flocculation and FS. (a) kaolin; (b) kaolin after flocculation; (c) FS.
